# Supplementary material
Source: PubMed Central journal article supplement (PMC3400406)

above interface

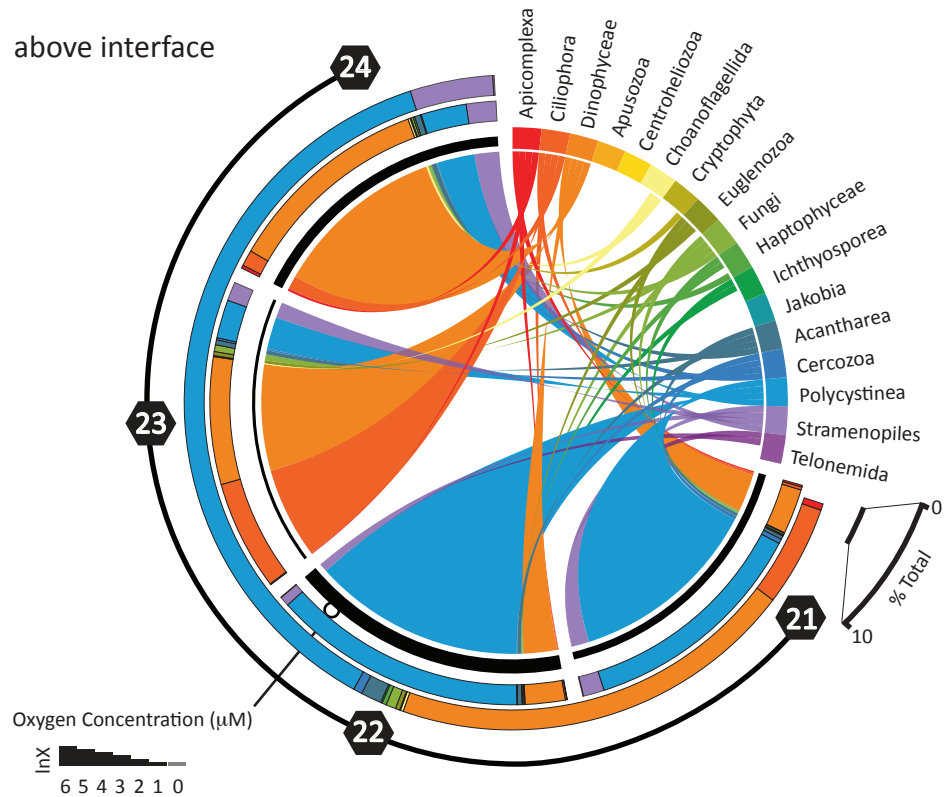

oxic-anoxic interface

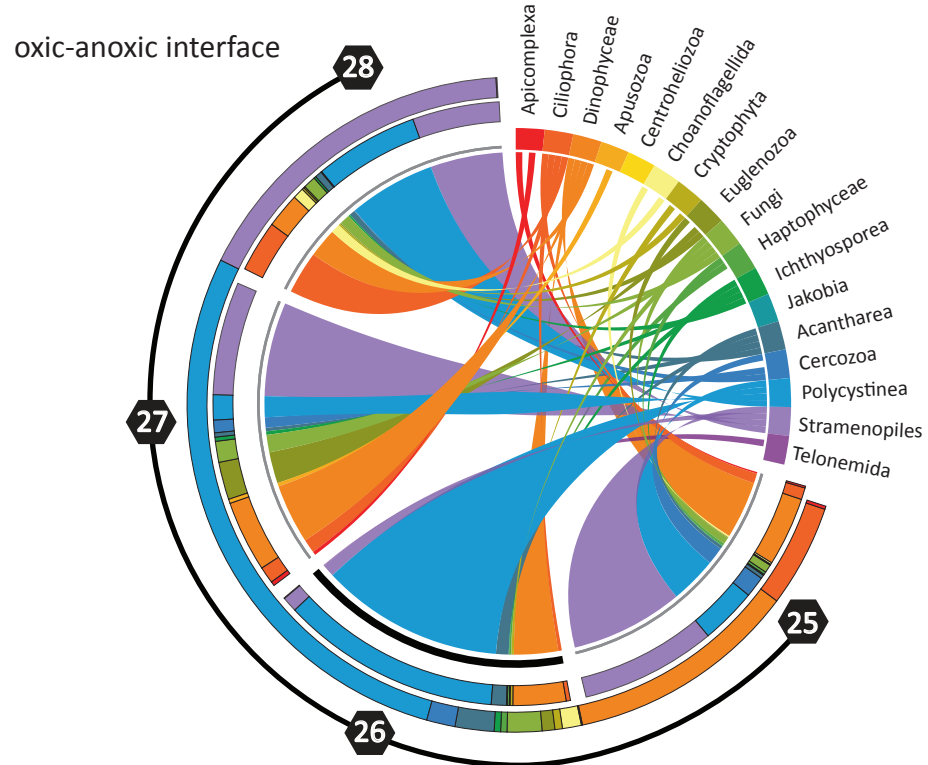

upper sulfidic boundary

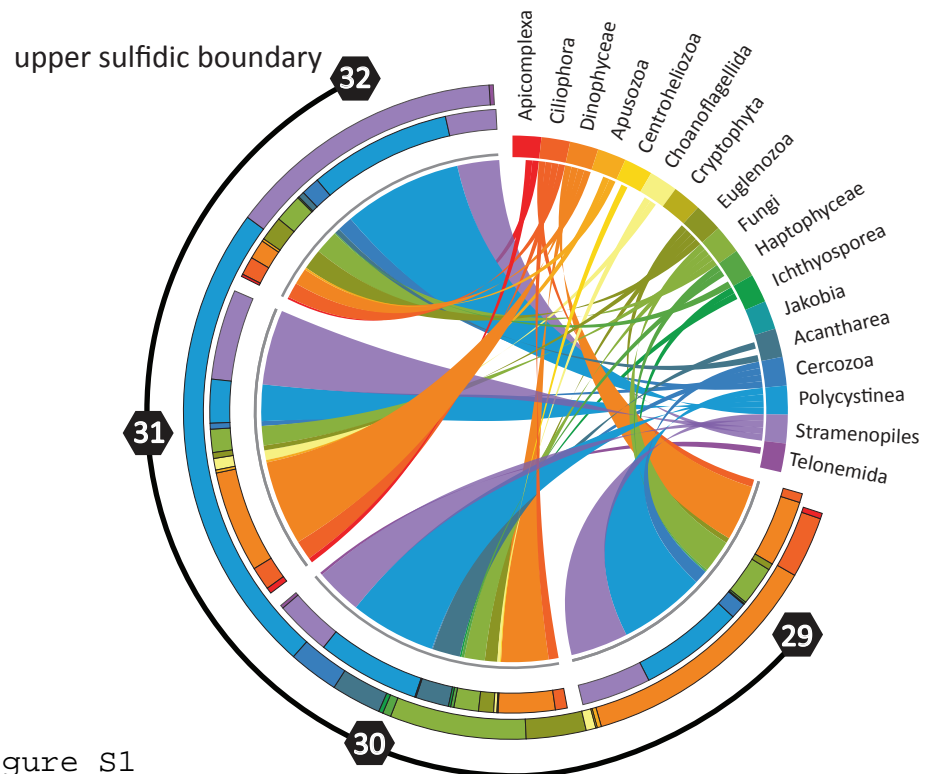

anoxic deep

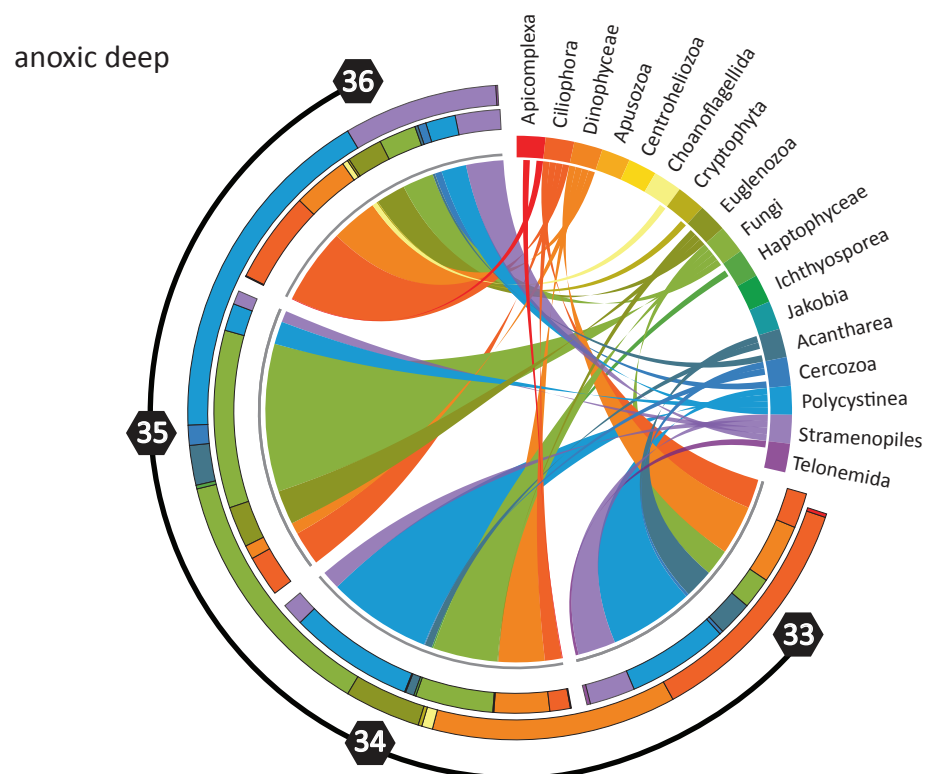

Figure S1

Supplement: ismej20127x3.pdf [file ismej20127x3.pdf]

oxic-anoxic interface

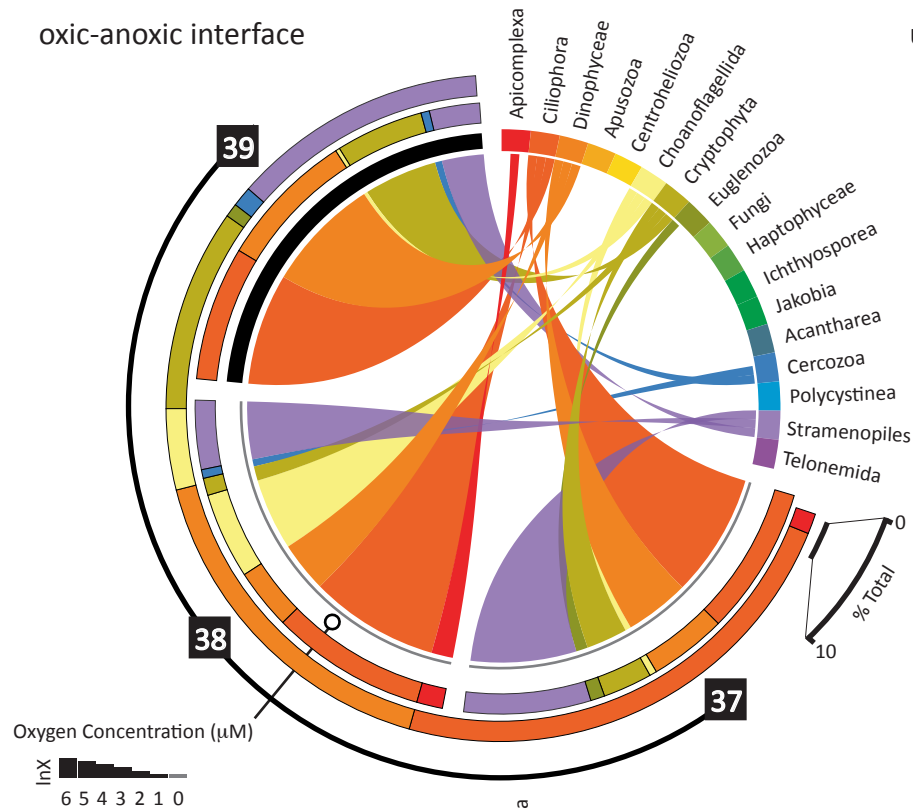

upper sulfidic boundary

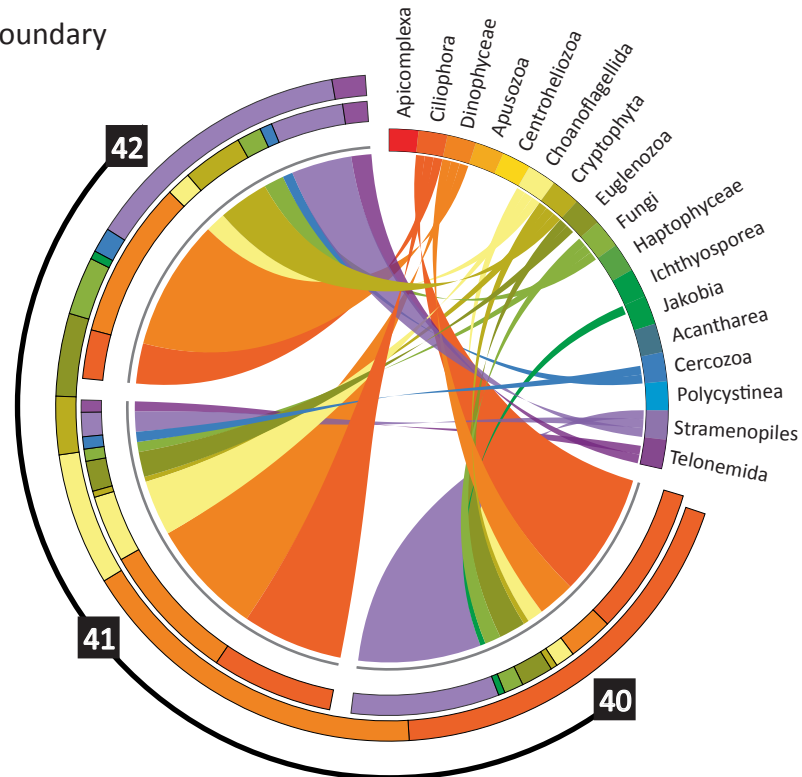

anoxic intermediate

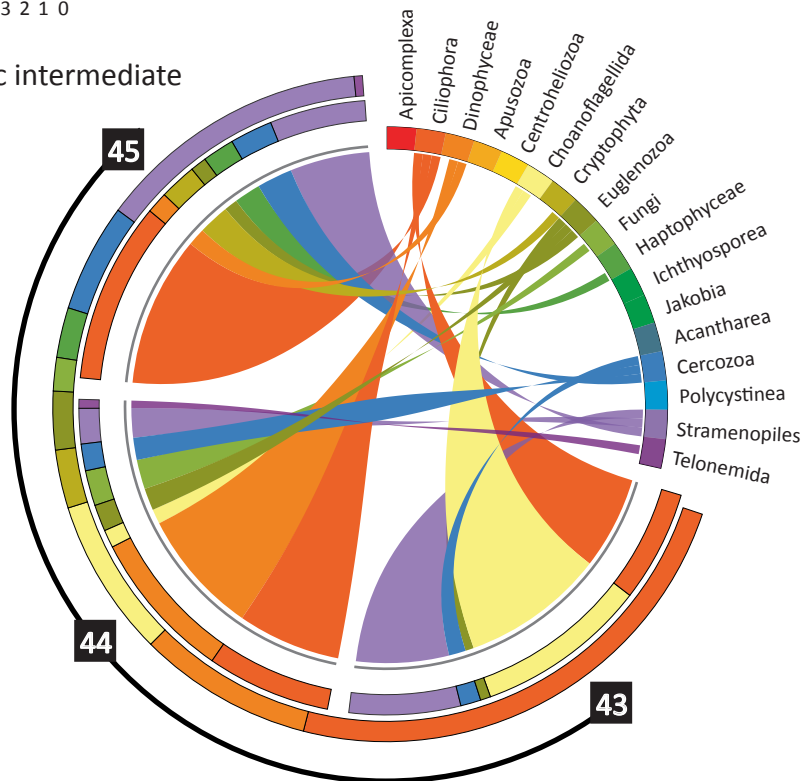

Figure S2

Supplement: ismej20127x4.pdf [file ismej20127x4.pdf]

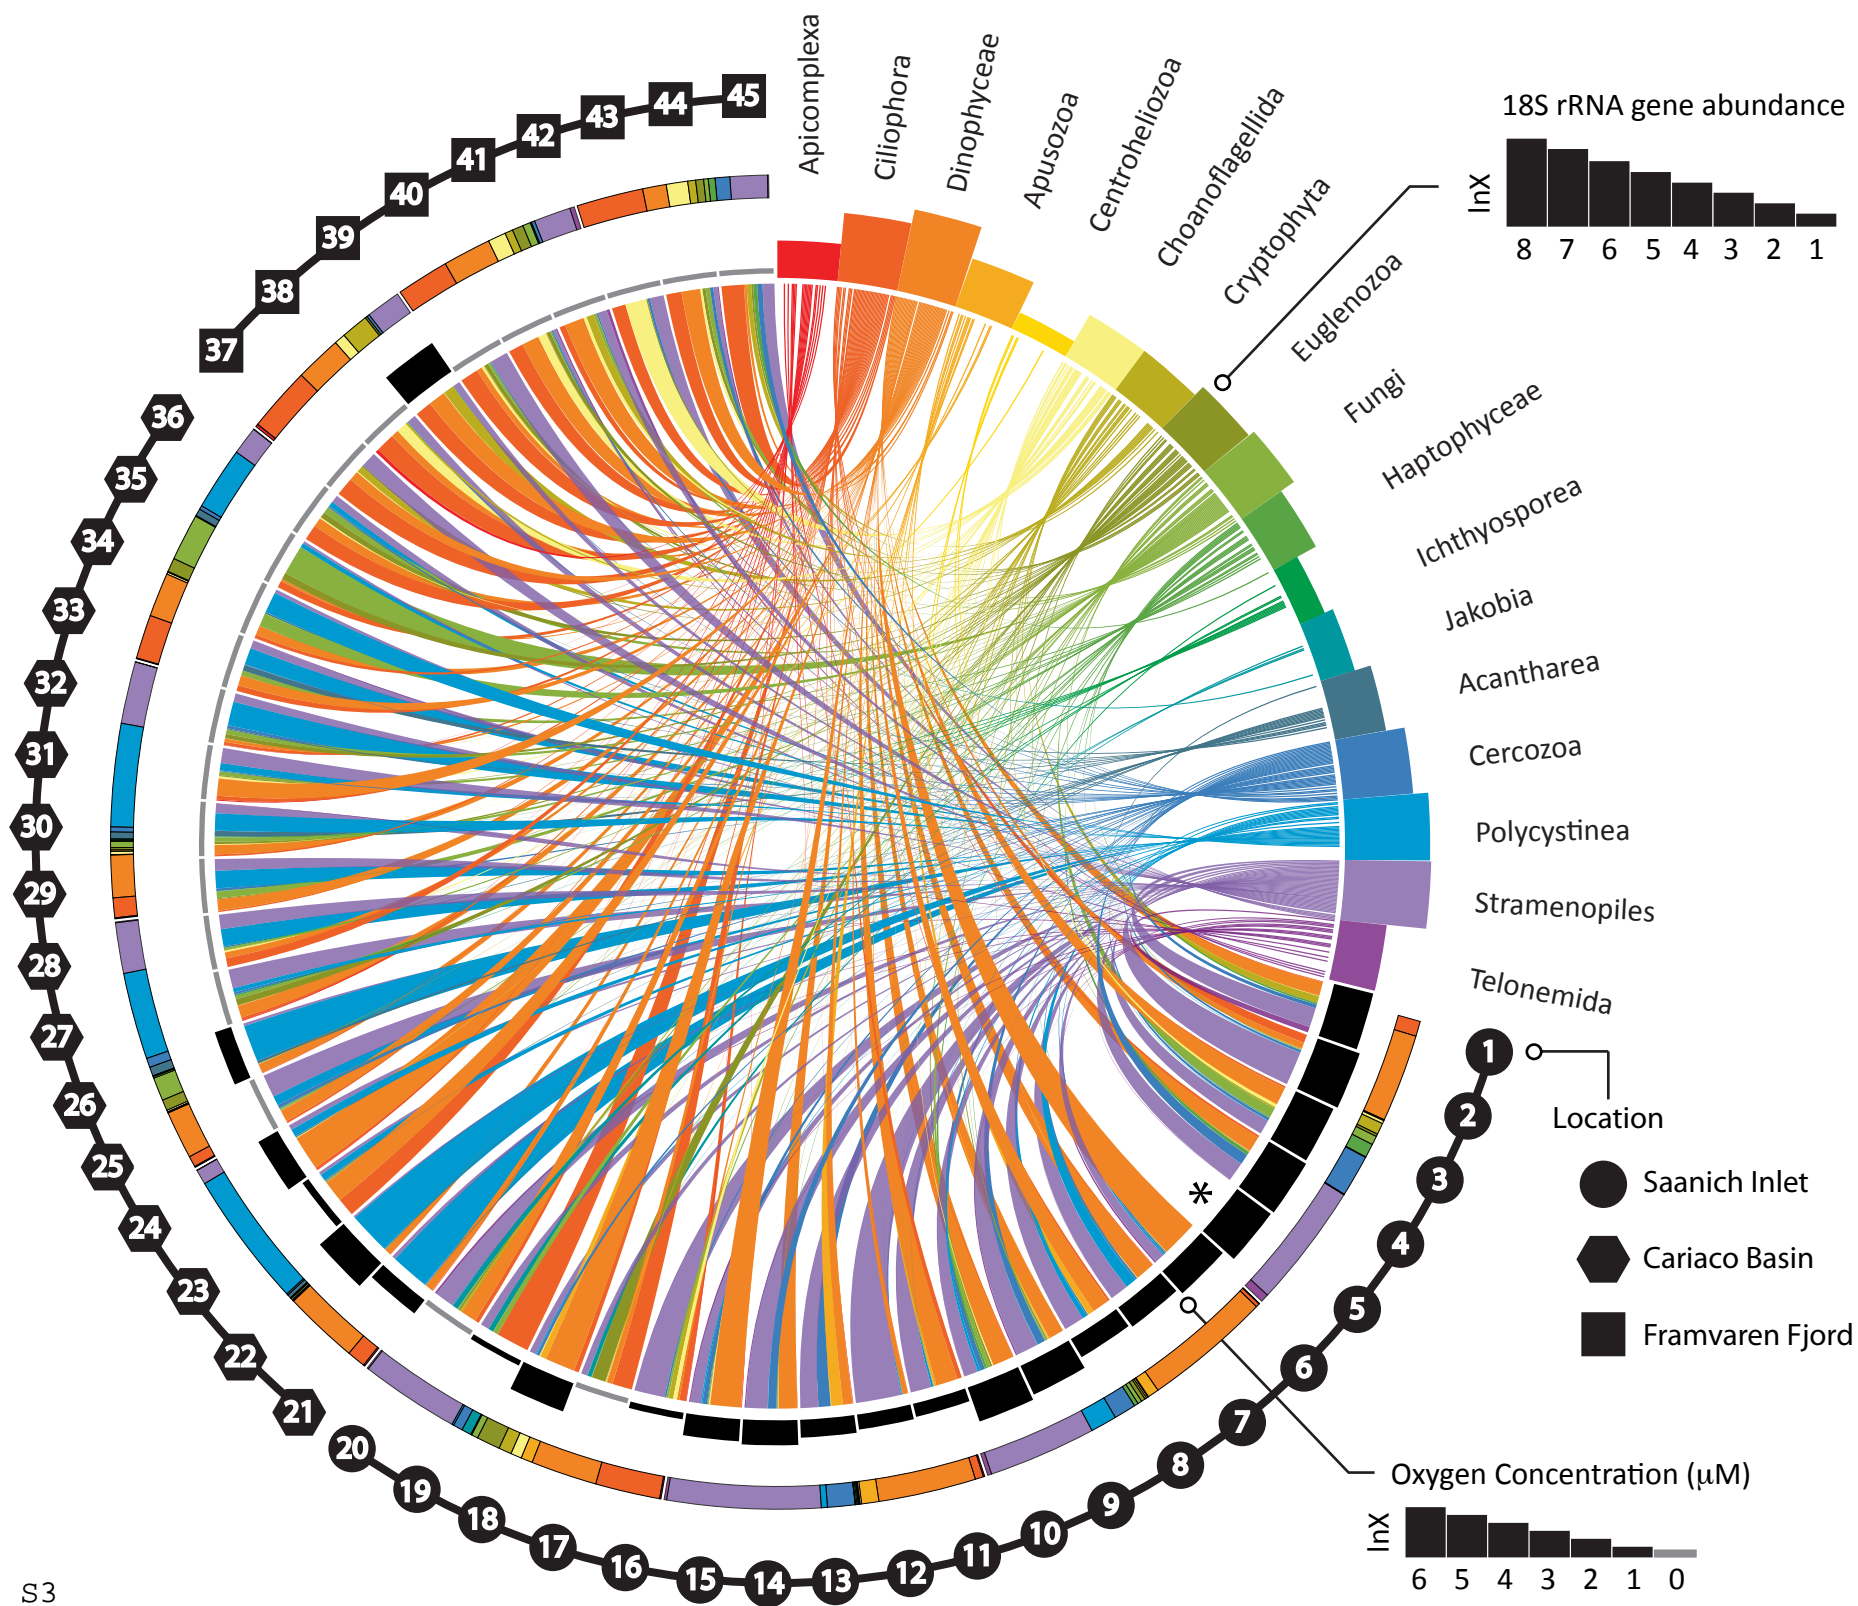

Figure S3

Supplement: ismej20127x5.pdf [file ismej20127x5.pdf]

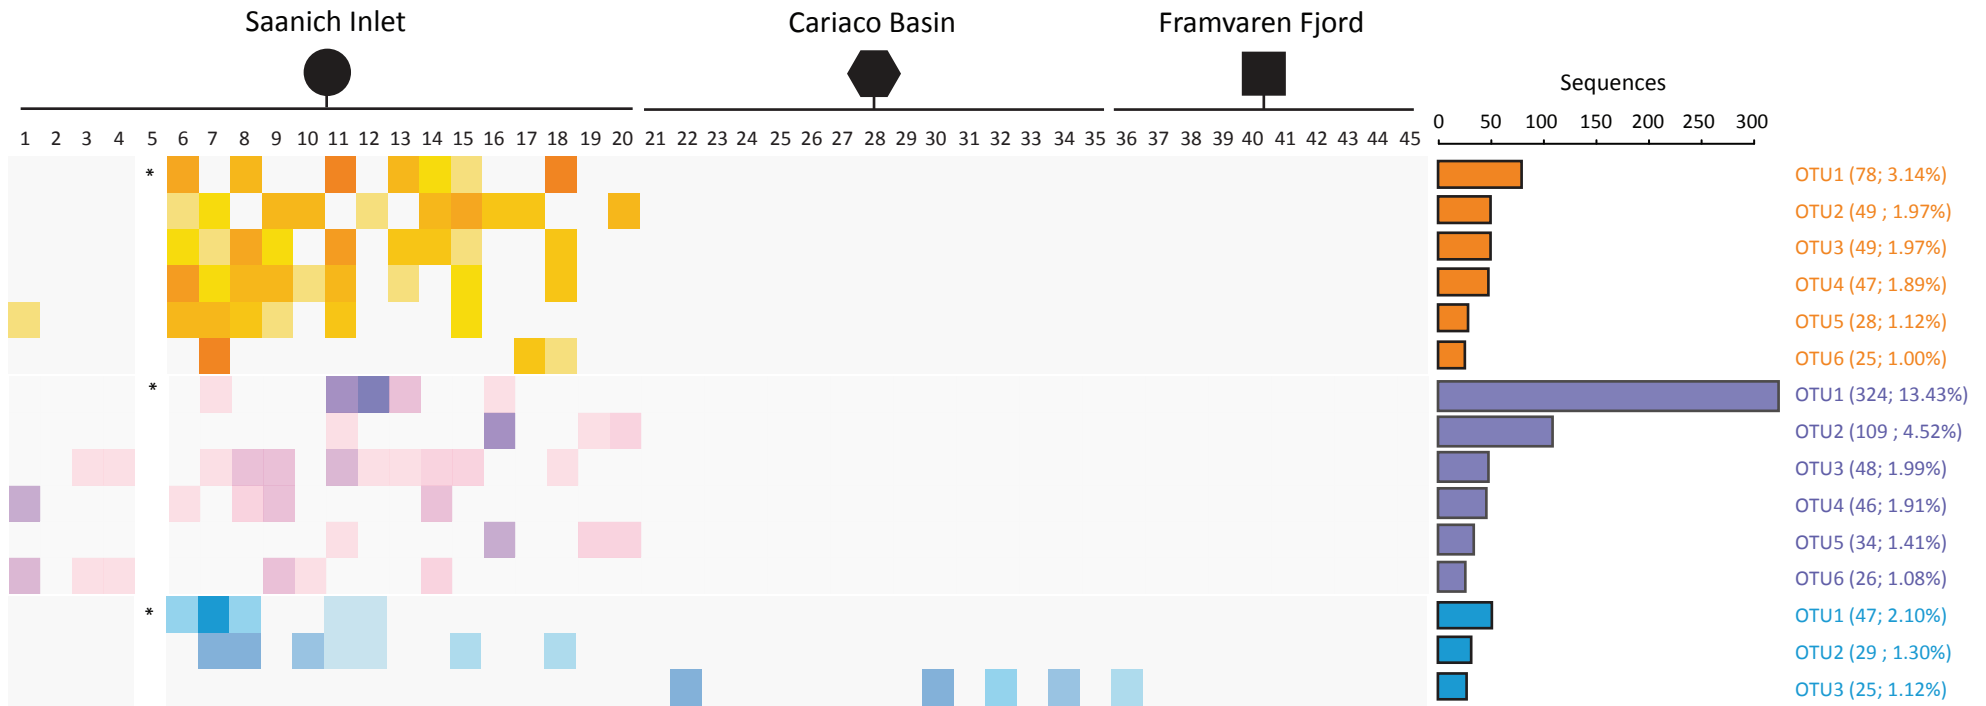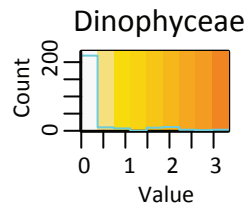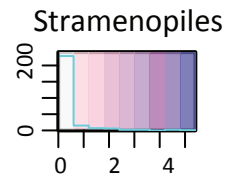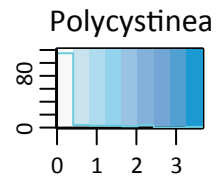

Figure S4

Supplement: ismej20127x6.pdf [file ismej20127x6.pdf]

Saanich Inlet

Cariaco Basin

Framvaren Fjord

Sequences

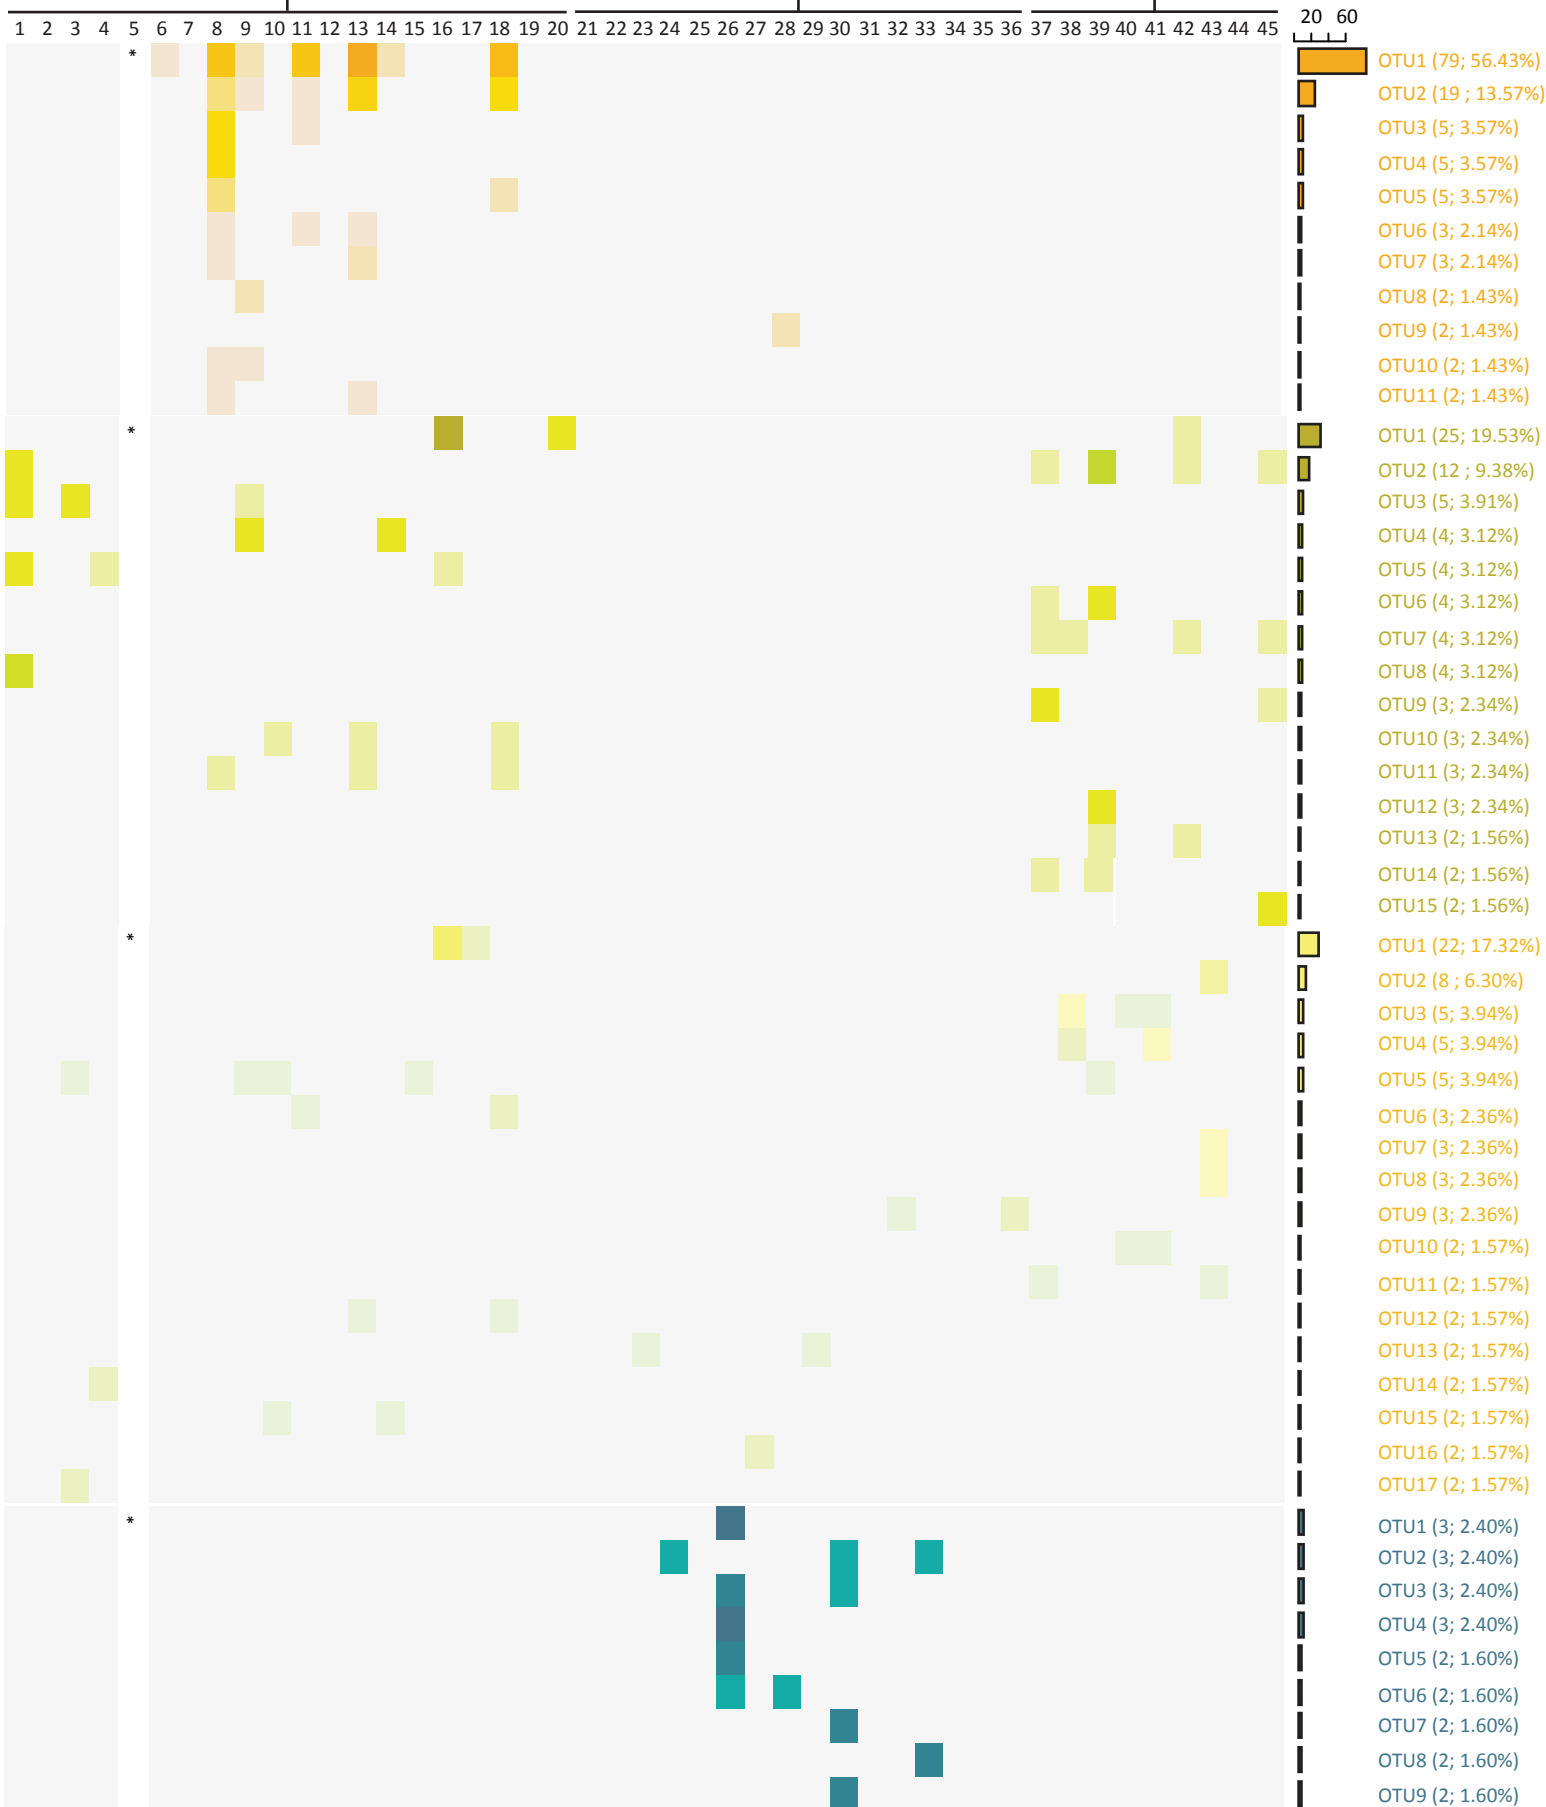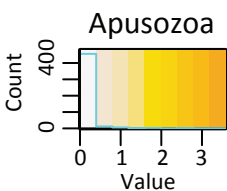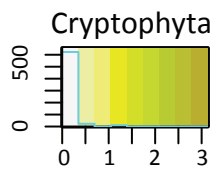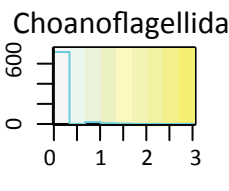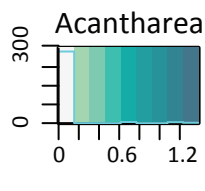

Figure S5

Supplement: ismej20127x7.pdf [file ismej20127x7.pdf]
